# Supplementary material
Source: publisher figshare collection journal article supplement (https://gsapubs.figshare.com/articles/dataset/_/13530608)
Supplement: Supplementary file 1 [file 1]

Mao, J., et al., 2021, Recognition of a Middle–Late Jurassic arc-related porphyry copper belt along the southeast China coast: Geological characteristics and metallogenic implications: *Geology*, v. 49, <https://doi.org/10.1130/G48615.1>

## **Supplemental Material**

### **Major Characteristics of the Ore Deposits**

The Yangchun basin of western Guangdong province (WGD), located in the southwesternmost belt, developed among a group of NE– and NEN–trending transpressive faults. Within the basin the stratigraphic sequence consists of Upper Devonian clastic and carbonate rocks. The Jurassic polymetallic Cu deposits are genetically associated with granodiorite, granodiorite porphyry and monzogranite dated at 170–160 Ma with LA–ICP–MS and SIMS zircon U–Pb methods (Li et al., 2000; Huang et al., 2013; Zheng et al., 2015; Ouyang et al., 2019). The Qiguling, Potoumian, Chadi, Mange’ling and Didougang polymetallic Cu skarn deposits occur at the contact between the Jurassic granodiorite plutons and Upper Devonian carbonate rocks. Zheng et al. (2018a, b) obtained molybdenite Re–Os ages of  $163.3 \pm 1.1$  Ma and  $164.5 \pm 0.9$  Ma for the Potoumian and Qiguling deposits, respectively.

In the eastern Guangdong province (EGD), tectonically located east to the Zhenghe–Dapu regional fault, granitic rocks are extensively developed, mainly of Late Jurassic, and some Triassic and Cretaceous age. The exposed strata in the area, comprising lower Jurassic siltstone, and upper Jurassic dacitic and rhyolitic rocks with

ages of 165–161 Ma (Wang, 2015; Liu et al., 2018; Jia et al., 2020), are distributed in a series of basins along a group of NE–striking transpressive faults. Several porphyry Cu deposits, comprising the Zhongqiuyang porphyry Cu, E'di Cu, Guantian Cu, Xinliaodong Cu–Mo, and Honggoushan Cu–Au deposits (Fig. 1) occur close to Late Jurassic volcanic basins. They are genetically associated with quartz diorite and granodiorite porphyry with an age range of 170–155 Ma, and hosted by Lower Jurassic siltstone and Upper Jurassic volcanic rocks as well as granitic plutons. Wang et al. (2017) obtained a zircon U–Pb age of 160.1 Ma for the quartz diorite associated with the Xiliaodong Cu deposit. Liu et al. (2018) presented zircon U–Pb ages of 169.4 Ma and 155.6 Ma for the ore-related granodiorite porphyry from the E'di and Honggoushan Cu–Au deposits, respectively. Jia et al. (2019) reported a zircon U–Pb age of 161.7 Ma for the ore-related granodiorite porphyry from the Zhongqiuyang Cu deposit area.

The Gutian porphyry Cu–Mo deposit (Fig. 1) is located at the southwestern margin of the intersection of the Gutian–Baisha NE–trending fault and the Ninghua–Anxi NW–trending fault, east and close to the Zhenghe–Dapu regional fault. The porphyry Cu–Mo deposit is related to a magmatic complex with an outcrop area of 20 km<sup>2</sup>, comprising early granodiorite, granodiorite porphyry and late tonalite dikes. The Gutian Cu–Mo deposit is mainly hosted by the granodiorite intrusion and granodiorite porphyry. The orebodies are dominantly characterized by veinlets to stockworks at several millimeters to centimeters in width and minor disseminated ores.

[Li et al. \(2016\)](#) obtained both zircon U–Pb and molybdenite Re–Os ages of ca. 160 Ma for the Gutian granodiorite porphyries and related porphyry Cu–Mo ores, respectively.

Both the Dingjiashan and Fengyan Pb–Zn–Cu deposits ([Fig. 1](#)) are located at the margin of the "metamorphic basement window" of the Mid–Late Proterozoic Mamianshan Group, surrounded by Jurassic volcanic rocks. Proterozoic Mamianshan Group is a suite of high greenschist to low amphibolite facies of volcano–sedimentary rocks with granulite, marble and schist units ([Feng et al., 2008](#)), covered by Upper Jurassic tuffaceous sandy conglomerate, feldspar quartz sandstone intercalated with fine sandstone, siliceous siltstone, sandy mudstone. There are extensive Cretaceous volcanic rocks outside of the uplift. The dominant Pb–Zn–Cu orebodies are mainly hosted by skarn developed along the Proterozoic carbonate rock layers intercalated with quartz mica schist, and minor in Upper Jurassic volcanic rocks along fractures. Mineralization shows a zoning from buried granite porphyry type Mo, layer–like Cu–Pb–Zn to Pb–Zn upward. The zircon U–Pb ages of the porphyry associated with the porphyry Mo ores are dated at 158 – 155 Ma ([Xiao et al., 2019, 2020](#)).

The northernmost part of the ore belt hosts porphyry–skarn polymetallic Cu systems with an age range of 171 – 153 Ma in northeast Jiangxi and western Zhejiang provinces (NEJWZ), geologically located between the Qinhang and Zhenghe–Dapu regional faults ([Fig. 1](#)). There are also Jurassic volcanic rocks, which are only seen as

remnants on the Precambrian basement in the Lede basin, where the Dexing porphyry Cu–Au–Mo cluster comprising Tongchang Cu–Au, Zhushahong Cu–Mo, Fujiawu Cu–Mo and Yinshan porphyry Cu–epithermal Ag–Pb–Zn deposits occur, genetically associated with 170 Ma granodiorites ([Zhu et al., 1983](#); [Li and Sasaki, 2007](#); [Li et al., 2013](#)). [Mao et al. \(2011\)](#) proposed that the porphyry Cu–Au–Mo, epithermal Ag–Pb–Zn and lode Au as well as shear zone hosted Au in the distal contact could be one ore system. Due to strong erosion there are no Jurassic volcanic rocks preserved in the mine areas of the Dongxiang, Yongping, Longtougang, Tongcun and Linghou deposits. The Yongping and Longtougang skarn Cu–Mo deposits formed in Carboniferous limestone and dolomite around 164–152 Ma porphyritic granite and granite porphyry ([Wu et al., 2015](#); [Zhu et al., 2016](#)), whereas hydrothermal vein type Cu ores in the Dongxiang mine formed along a group of NE–trending faults in the Upper–Lower Carboniferous quartz sandstone, sandstone, shale and conglomerate intruded by 160.5 Ma granodiorite dikes ([Cai et al., 2016](#)). The host rocks for the 168–156 Ma granite porphyries ([Qiu et al., 2011](#)) are Cambrian to Ordovician clastic rocks and Carboniferous dolomite in the Tongcun Mo–Cu mine area it formed skarn deposit whereas the host rocks for the 160.6 Ma granodiorite and granite porphyry are Upper Carboniferous dolomite in the Linghou (or Jiande) Cu mine it also formed the magnesian skarn deposit ([Tang et al., 2017b](#)).

## REFERENCES CITED

Barry, T.L., Saunders, A.D., Kempton, P.D., Windley, B.F., Pringle, M.S., Dorjnamjaa, D., and

- Saandar, S., 2003, Petrogenesis of Cenozoic basalts from Mongolia: Evidence for the role of asthenospheric versus metasomatized lithospheric mantle sources: *Journal of Petrology*, v. 44, p. 55–91, <https://10.1093/petrology/44.1.55>.
- Boynton, W.V., 1984, Geochemistry of the rare earth elements: meteorite studies. In: Henderson, P. (Ed.), *Rare Earth Element Chemistry*. Elsevier, Amsterdam, 63–114 p.
- Cai, Y.T., Ni, P., Wang, G.G., Pan, J.Y., Zhu, X.T., Chen, H., and Ding, J.Y., 2016, Fluid inclusion and H–O–S–Pb isotopic evidence for the Dongxiang Manto-type copper deposit, South China: *Journal of Geochemical Exploration*, v. 171, p. 71–82, <https://10.1016/j.gexplo.2016.01.019>.
- Chen, B.H., Chen, J.D., Guo, R., and Yu, S.Y., 1992, The genesis of Yushui copper–polymetallic deposit in Meixian County, Guangdong Province: *Guangdong Geology*, v. 7, p. 59–69 (in Chinese with English abstract).
- Ding, X., Jiang, S.Y., Ni, P., Gu, L.X., and Jiang, Y.H., 2005, Zircon SIMS U–Pb geochronology of host granitoids in Wushan and Yongping copper deposits, Jiangxi Province: *Geological Journal of China Universities*, v. 11, p. 383–389 (in Chinese with English abstract), <https://10.16108/j.issn1006-7493.2005.03.009>.
- Feng, C.Y., Zhang, D.Q., Li, D.X., She, H.Q., and Dong, Y.J., 2008, Isotope and geochronology of the Meixian-type Pb–Zn–(Ag) deposits, central Fujian rift, south China: implications for geological events: *Acta Geologica Sinica (English Edition)*, v. 82, p. 826–837.
- Gao, F.Y., Huang, H.X., Zeng, Z.F., and Fang, F., 2018, Geological characteristics and metallogenic regularity of gold silver polymetallic deposit in Honggoushan, Guangdong: *Mineral Exploration*, v. 9, p. 374–380 (in Chinese with English abstract).

- He, Z.Y., Xu, X.S., and Niu, Y.L., 2010, Petrogenesis and tectonic significance of a Mesozoic granite–syenite–gabbro association from inland South China: *Lithos*, v. 119, p. 621–641, <https://10.1016/j.lithos.2010.08.016>.
- Hou, Z.Q., Pan, X.F., Li, Q.Y., Yang, Z.M., and Song, Y.C., 2013, The giant Dexing porphyry Cu–Mo–Au deposit in east China: product of melting of juvenile lower crust in an intracontinental setting: *Mineralium Deposita*, v. 48, p. 1019–1045, <https://10.1007/s00126-013-0472-5>.
- Huang, H.Q., Li, X.H., Li, Z.X., and Li, W.X., 2013, Intraplate crustal remelting as the genesis of Jurassic high–K granites in the coastal region of the Guangdong Province, SE China: *Journal of Asian Earth Sciences*, v. 74, p. 280–302, <https://10.1016/j.jseaes.2012.09.009>.
- Huang, Y., Sun, X.M., Shi, G.Y., Sa, R.N., Guan, Y., Jiang, X.D., and Que, H.H., 2015, Re–Os dating of sulphides from the Yushui Cu–polymetallic deposit in eastern Guangdong Province, South China: *Ore Geology Reviews*, v. 70, p. 281–289, <https://10.1016/j.oregeorev.2015.04.018>.
- Jia, L.H., Mao, J.W., and Zheng, W., 2019, Geochronology, geochemistry, and Sr–Nd–Hf–O isotopes of the Zhongqiyang rhyolitic tuff in eastern Guangdong, SE China: Constraints on petrogenesis and tectonic setting: *Geological Journal*, p. 1–19, <https://doi.org/10.1002/gj.3702>.
- Jia, L.H., Mao, J.W., Liu, P., YU, M., 2020. Crust–mantle interaction during subduction zone processes: Insight from late Mesozoic I–type granites in eastern Guangdong, SE China. *Journal of Asian Earth Science*, 192, [doi.org/10.1002/gj.3702](https://doi.org/10.1002/gj.3702).
- Jia, S.H., Zhao, Y.Y., Wang, Z.Q., Wu, Y.D., Wang, T., and Chen, L., 2014, Zircon U–Pb dating

and geochemical characteristics of granodiorite–porphyry in the Linghou copper deposit, western Zhejiang, and their geological significance: *Acta Geologica Sinica*, v. 88, p. 2071–2085 (in Chinese with English abstract), <https://10.3969/j.issn.0001-5717.2014.11.005>.

Li, B., Jiang, S.Y., Lu, A.H., Lai, J.Q., Zhao, K.D., and Yang, T., 2016, Petrogenesis of Late Jurassic granodiorites from Gutian, Fujian Province, South China: implications for multiple magma sources and origin of porphyry Cu–Mo mineralization: *Lithos*, v. 264, p. 540–554, <https://10.1016/j.lithos.2016.09.020>.

Li, X.H., Zhou, H.W., Liu, Y., Lee, C.Y., Chen, Z.H., Yu, J.S., and Gui, X.T., 2000. Mesozoic shoshonitic intrusives in the Yangchun basin, western Guangdong, and their tectonic significance: I. Petrology and isotope geochronology: *Geochimica*, v. 29, p. 513–520 (in Chinese with English abstract), <https://10.3321/j.issn:0379-1726.2001.01.007>.

Li, X.F., and Sasaki, M., 2007, Hydrothermal alteration and mineralization of middle Jurassic Dexing porphyry Cu–Mo deposit, southeast China: *Resource Geology*, v. 57, p. 409–426, <https://10.1111/j.1751-3928.2007.00032.x>.

Liu, P., Mao, J.W., Santosh, M., Bao, Z., Zeng, X.J., and Jia, L.H., 2018, Geochronology and petrogenesis of the Early Cretaceous A-type granite from the Feie'shan W–Sn deposit in the eastern Guangdong Province, SE China: Implications for W–Sn mineralization and geodynamic setting: *Lithos*, v. 300–301, p. 330–347, <https://10.1016/j.lithos.2017.12.015>.

Mao, J.W., Zhang, J.D., Pirajno, F., Ishiyama, D., Su, H.M., Guo, C.L., and Chen, Y.C., 2011, Porphyry Cu–Au–Mo—epithermal Ag–Pb–Zn—distal hydrothermal Au deposits in the Dexing area, Jiangxi province, East China—a linked ore system: *Ore Geology Reviews*, v. 43,

p. 203–216, <https://10.1016/j.oregeorev.2011.08.005>.

Ouyang, X.C., 2015, Geological and geochemical characteristics and its genesis of the Dongxiang copper deposit, Jiangxi Province [Master thesis]: China University of Geosciences (Beijing), 1–78 p. (in Chinese with English abstract).

Ouyang, Z.X., Chu, K.L., Chen, Y.L., Wu, X.D., Yang, S.H., Wang, R.P., Liu, D.H., and Wang, L.M., 2017, Zircon U–Pb dating, geochemistry and petrogenesis of granodiorite from Wenguanling Pb–Zn–Cu polymetallic deposit in Guangdong Province: *Earth Science*, v. 44, p. 1327–1337 (in Chinese with English abstract), <https://doi.org/10.3799/dqkx.2017.591>.

Qiu, J.T., Yu, X.Q., Zhang, D.H., Dai, Y.P., Li, H.K., and Chen, S.Q., 2011, LA–ICP–MS zircon U–Pb dating of the Tongcun porphyry in Kaihua County, western Zhejiang Province, and its geological significance: *Geological Bulletin of China*, v. 30, p. 1360–1368 (in Chinese with English abstract), <https://10.3969/j.issn.1671-2552.2011.09.004>.

Plank, T., and Langmuir, C.H., 1998, The chemical composition of subducting sediment and its consequences for the crust and mantle: *Chemical Geology*, v. 145, p. 325–394, [https://10.1016/S0009-2541\(97\)00150-2](https://10.1016/S0009-2541(97)00150-2).

Sun, H.T., Wang, Q.L., Lei, R.X., Chen, S.Z., Chen, G., and Wu, C.Z., 2014, LA–ICP MS zircon U–Pb age, petrogenesis and metallogenic effect for porphyry granites from the Meixian Pb–Zn deposit in the central Fujian rift, southeast China: *Journal of Jilin University (Earth Science Edition)*, v. 44, p. 527–539 (in Chinese with English abstract), <https://10.13278/j.cnki.jjuese.201402111>.

Sun, S.S., and McDonough, W.F., 1989, Chemical and isotopic systematics of oceanic basalts: implication for mantle composition and process. In: Saunders, A.D., Norry, M.J.(Eds.),



- Magmatism in the Ocean Basin: Geological Society Special Publication, v. 42, p. 313–345, <https://10.1144/GSL.SP.1989.042.01.19>.
- Tang, Y.W., Xie, Y.L., Liu, L., Lan, T.G., Yang, J.L., Sebastien, M., Yin, R.C., Liang, S.S., and Zhou, L.M., 2017a, U–Pb, Re–Os and Ar–Ar dating of the Linghou polymetallic deposit, Southeastern China: implications for metallogenesis of the Qingzhou–Hangzhou metallogenic belt: *Journal of Asian Earth Sciences*, v. 137, p. 163–179, <https://10.1016/j.jseaes.2017.02.016>.
- Tang, Y.W., Li, X.F., Xie, Y.L., Liu, L., Lan, T.G., Meffre, S., and Huang, C., 2017b, Geochronology and geochemistry of late Jurassic adakitic intrusions and associated porphyry Mo–Cu deposit in the Tongcun area, east China: Implications for metallogenesis and tectonic setting: *Ore Geology Reviews* v. 80, p. 289–308, <https://10.1016/j.oregeorev.2016.06.032>.
- Vervoort, J.D., Patchett, P.J., Blichert–Toft, J., and Albarède, F., 1999, Relationships between Lu–Hf and Sm–Nd isotopic systems in the global sedimentary system: *Earth and Planetary Science Letters*, v. 168, p. 79–99, [https://10.1016/S0012-821X\(99\)00047-3](https://10.1016/S0012-821X(99)00047-3).
- Wang, G.G., Ni, P., Zhao, K.D., Wang, X.L., Liu, J.Q., Jiang, S.Y., and Chen, H., 2012, Petrogenesis of the Middle Jurassic Yinshan volcanic–intrusive complex, SE China: Implications for tectonic evolution and Cu–Au mineralization: *Lithos*, v.150, p. 135–154, <https://doi.org/10.1016/j.lithos.2012.05.030>.
- Wang, X.Y., 2015, Preliminary study on geological characteristics and genesis of the Xinliaodong Cu polymetallic deposit in eastern Guangdong province, China [Master thesis]: China University of Geosciences (Beijing), 1–78 p (in Chinese with English abstract).
- Wang, X.Y., Mao, J.W., Cheng, Y.B., Liu, P., and Zhang, X.K., 2016, Zircon U–Pb age,

- geochemistry and Hf isotopic compositions of quartz diorite from the Xinliaodong Cu polymetallic deposit in eastern Guangdong Province: *Geological Bulletin of China*, v. 35, p. 1357–1375 (in Chinese with English abstract), <https://10.3969/j.issn.1671-2552.2016.08.016>.
- Wei, J.J., 2015, The magmatism of granitoid and metallization of Longtougang–Wangwu copper polymetallic ore field in North Wuyi region [Master thesis]: China University of Geosciences (Beijing), 1–78 p (in Chinese with English abstract).
- Wu, S.H., Mao, J.W., Xie, G.Q., Geng, J.Z., and Xiong, B.K., 2015, Geology, geochronology, and Hf isotope geochemistry of the Longtougang skarn and hydrothermal vein Cu–Zn deposit, North Wuyi area, southeastern China: *Ore Geology Reviews*, v. 70, p. 136–150, <https://10.1016/j.oregeorev.2015.04.012>.
- Xiao, X.N., Fei, L.D., Yu, X.M., Qin, X.L., Xiao, E., and Liu, R.F., 2019, Zircon U–Pb age, Sr–Nd isotopic characteristics and its geological significance of the granites from the Meixian zinc–lead polymetallic deposit, central Fujian Province: *Geological Bulletin of China*, v. 38, p. 1733–1739 (in Chinese with English abstract).
- Xiao, X.N., Xiao, E., Chen, Z.N., Gong, B., and Ju, W.W., 2020, Geochronology, geochemistry and geological characteristics of the granites from Meixian zinc–lead polymetallic deposit, Central of Fujian Province: *Earth Science Frontiers*, under review (in Chinese with English abstract).
- Xu, X.S., O'Reilly, S.Y., Griffin, W.L., Wang, X.L., Pearson, N.J., and He, Z.Y., 2007, The crust of Cathaysia: Age, assembly and reworking of two terranes: *Precambrian Research*, v. 158, p. 51–78, <https://doi.org/10.1016/j.precamres.2007.04.010>.

- Zheng, Wei., 2016, The Yanshanian minerogenetic series and mineralization of polymetallic deposit in the Yangchun Basin of Yunkai area, South China [Ph.D. thesis]: China University of Geosciences (Beijing), 1–298p (in Chinese with English abstract).
- Zheng, W., Mao, J.W., Zhao, H.J., Zhao, C.S., Ling, W.P., Ouyang, Z.X., Wu, X.D., and Tian, Y., 2015, A preliminary study of minerogenetic series and geodynamic background of polymetallic deposit along Yangchun basin in Western Guangdong, South China: Mineral Deposits, v. 34, p. 465–487 (in Chinese with English abstract), <https://10.16111/j.0258-7106.2015.03.003>.
- Zheng, W., Mao, J.W., Ouyang, Z.X., Zhao, C.S., Yu, X.F., Zhao, H.J., Liu, D.H., and Wu, X.D., 2018a, Geochronology of Potomian Cu polymetallic deposit in Yangchun basin, zircon trace element and geological implications: Acta Petrologica Sinica, v. 34, p. 2671–2686 (in Chinese with English abstract).
- Zheng, W., Ouyang, Z.X., Chen, Y.L., Zhao, H.J., Liu, D.H., Wu, X.D., Yang, S.H., Wang, R.P., and Chu, K.L., 2018b, Re–Os age of molybdenite and ore-forming material source of the Qiguling Cu–W–Mo polymetallic deposit in the Southern Section of the Qinhang metallogenic belt: Acta Geologica Sinica, v. 92, p. 94–106 (in Chinese, with English abstract), <https://10.3969/j.issn.0001-5717.2018.01.007>.
- Zhou, Q., Jiang, Y.H., Zhao, P., Liao, S.Y., and Jin, G.D., 2012, Origin of the Dexing Cu-bearing porphyries, SE China: elemental and Sr–Nd–Pb–Hf isotopic constraints: International Geology Review, v. 54, p. 572–592, <https://10.1080/00206814.2010.548119>.
- Zhu, X., Huang, C.K., Rui, Z.Y., Zhou, Y.H., Zhu, X.J., Hu, Z.S., and Mei, Z.K., 1983, The Geology of Dexing Porphyry Copper Ore Field: Beijing, Geological Publishing House, 336 p.

(in Chinese with English abstract).

Zhu, X.T., Ni, P., Wang, G.G., Cai, Y.T., Chen, H., and Pan, J.Y., 2016, Fluid inclusion, H–O isotope and Pb–Pb age constraints on the genesis of the Yongping copper deposit, South China: *Journal of Geochemical Exploration*, v. 171, p. 55–70, <https://10.1016/j.gexplo.2016.01.018>.

Zhu, Y.D., Zhang, D.H., Wang, L.L., Dai, Y.P., and Xi, A.H., 2017, SHRIMP zircon U–Pb dating, geochemistry and Sr–Nd–Hf isotopes of the Tongcun ore–bearing porphyry in NW Zhejiang Province, South China: *Journal of Geochemical Exploration*, v. 172, p. 50–61, <https://10.1016/j.gexplo.2016.09.007>.

## FIGURE CAPTIONS

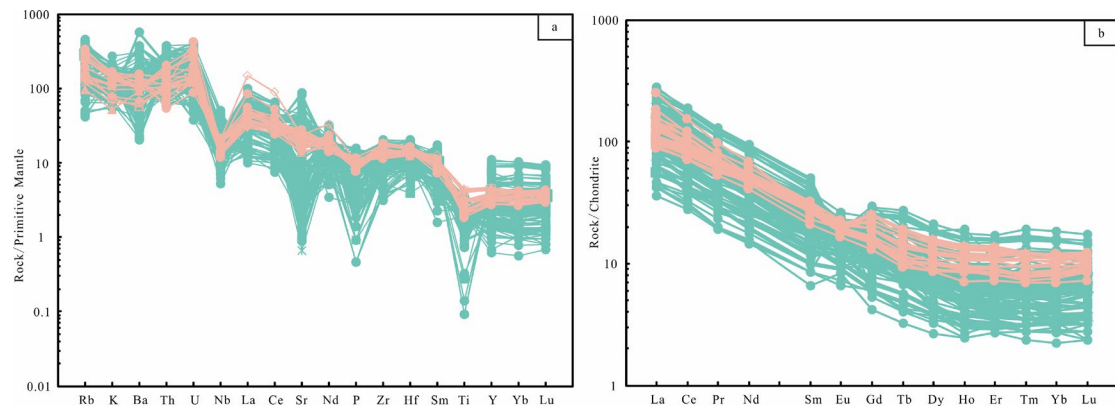

**Figure DR1** Chondrite-normalized REE patterns (after [Boynton, 1984](#)) and primitive-mantle-normalized spider diagrams (after [Sun and McDonough, 1989](#)) for ore-bearing porphyries from the porphyry Cu deposits of the Southeast China coastal belt.

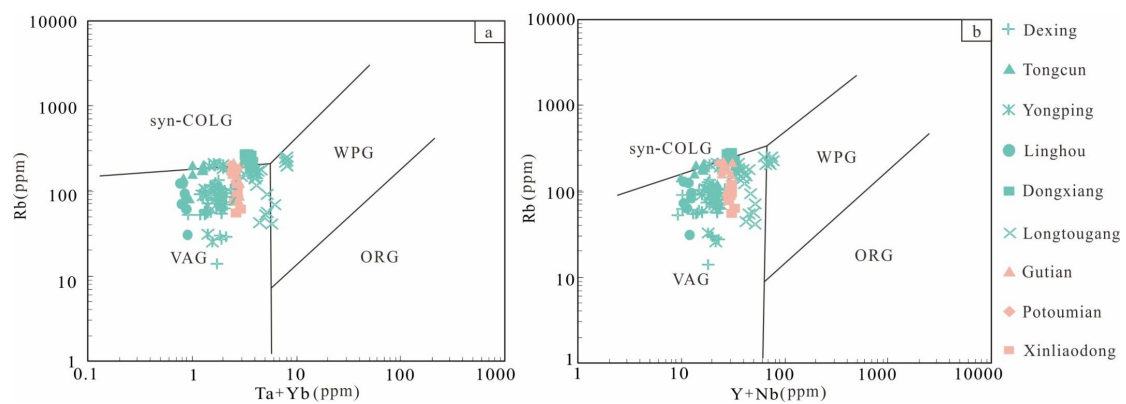

**Figure DR2** Tectonic discrimination diagrams of (Ta+Yb)–Rb (a) and (Y+Nb)–Rb (b) (after [Pearce et al., 1984](#)) for ore-bearing porphyries from the porphyry-skarn Cu-polymetallic deposits.

ORG=ocean ridge granite; VAG=volcanic-arc granite; syn-COLG=syn-collisional granite and WPG=within-plate granites. Note that post-collisional granites plot around the COLG–VAG–WPG triple point.

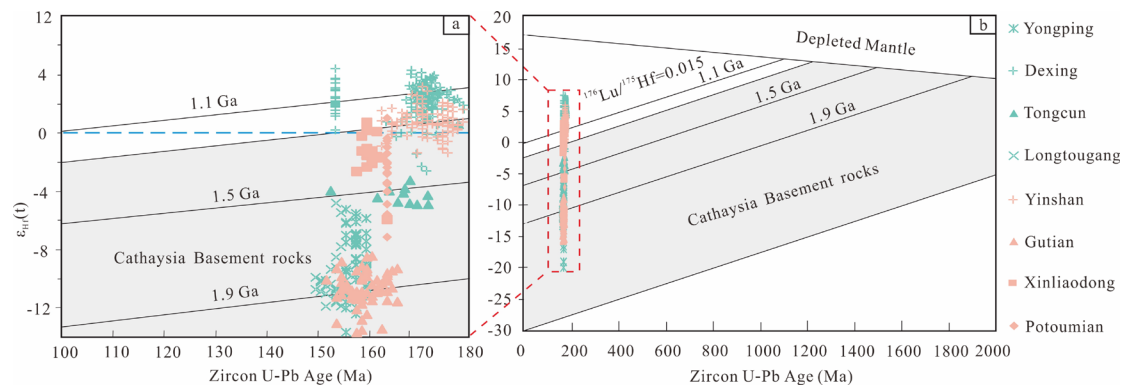

**Figure DR3** Plot of  $\epsilon_{\text{Hf}}(t)$  versus U–Pb ages of zircons for ore–bearing porphyries from the porphyry–skarn Cu–polymetallic deposits. Cathaysia crustal basement data are from [Xu et al. \(2007\)](#) and [He et al. \(2010\)](#).

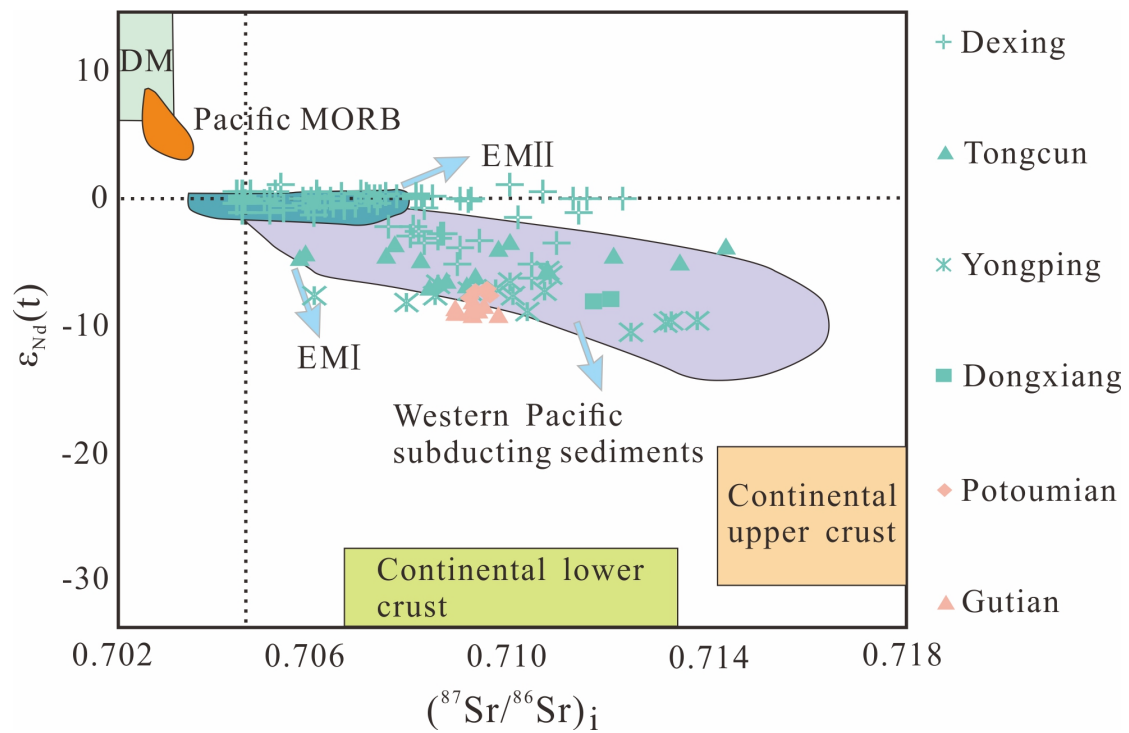

**Figure DR4** Diagrams of  $(^{87}\text{Sr}/^{86}\text{Sr})_i$  versus  $\epsilon_{\text{Nd}}(t)$  for ore–bearing porphyries from the porphyry–skarn Cu–polymetallic deposits. Western Pacific subducting sediments are from [Plank and Langmuir \(1998\)](#); Pacific MORB from [Vervoort et al. \(2000\)](#), and DM from [Barry et al. \(2003\)](#).

## TABLE CAPTIONS

**Table DR1** The major characteristics of the porphyry, skarn and hydrothermal vein polymetallic copper deposits in the Southeast China coastal belt.
